# Supplementary material for: Barriers and facilitators to implementation, uptake and sustainability of community-based health insurance schemes in low- and middle-income countries: a systematic review
Source: Springer Nature journal article supplement (doi:10.1186/s12939-018-0721-4), 2018-01-29
Supplement: MOESM3 [file 15422324]

**Supplementary file 3: List of the excluded studies with reasons for exclusion**

| <b>Coded reason for exclusion</b> | <b>Reason for exclusion</b>                                                                              | <b>Number of studies</b> |
|-----------------------------------|----------------------------------------------------------------------------------------------------------|--------------------------|
| 1                                 | Not in English                                                                                           | <b>0</b>                 |
| 2                                 | Not in low- and middle-income country                                                                    | <b>0</b>                 |
| 3                                 | Not a primary study or a case study with clear methodology                                               | <b>2</b>                 |
| 4                                 | Proposed scheme                                                                                          | <b>1</b>                 |
| 5                                 | Not about community-based health insurance specifically (e.g. essential benefit package at primary care) | <b>21</b>                |
| 6                                 | Does not report on any of the outcomes of interest                                                       | <b>5</b>                 |
| 7                                 | Focuses on willingness to pay                                                                            | <b>2</b>                 |
| 8                                 | National health insurance, social health insurance, vouchers or disease-specific packages                | <b>4</b>                 |
| 9                                 | Focuses on integration of services                                                                       | <b>1</b>                 |
| 10                                | Impact study                                                                                             | <b>5</b>                 |

## Excluded studies

| Author's last name                                               | Year of publication | Coded reason for exclusion | Additional comment                                                                                 |
|------------------------------------------------------------------|---------------------|----------------------------|----------------------------------------------------------------------------------------------------|
| Aggarwal<br>(Aggarwal, 2010)                                     | 2010                | 10                         | Impact study                                                                                       |
| Ameli (Tarrier,<br>Taylor, & Gooding,<br>2008)                   | 2008                | 5                          | Not about community-based health insurance specifically (essential package at primary health care) |
| Arhin (Arhin,<br>1994)                                           | 1994                | 6                          | A national health card insurance scheme                                                            |
| Bascolo (Bascolo<br>& Yavich, 2009)                              | 2009                | 5                          | Not about community-based health insurance specifically                                            |
| Baleba (Baleba,<br>Gankpe, Mesenge,<br>Aoun, & Rapp,<br>2013)    | 2013                | 6                          | Not outcome of interest                                                                            |
| Blaakman<br>(Blaakman, Salehi,<br>& Boitard, 2014)               | 2014                | 5                          | Not about community-based health insurance specifically (essential package at primary health care) |
| Borghì (Borghì et<br>al., 2013)                                  | 2013                | 9                          | Integration as opposed to implementation                                                           |
| Baza (Baza, 1993)                                                | 1993                | 6                          | Not outcome of interest                                                                            |
| Chen (Chen, Yang,<br>Li, & Li, 2012)                             | 2012                | 8                          | insurance coverage, mainly against major illnesses treated at inpatient settings                   |
| (Dong, Gbangou,<br>De Allegri,<br>Pokhrel, &<br>Sauerborn, 2008) | 2008                | 7                          | willingness to pay                                                                                 |
| (De Allegri,<br>Sauerborn,                                       | 2009                | 3                          | Literature review (not primary study)                                                              |

|                                                              |      |   |                                                                                                                                        |
|--------------------------------------------------------------|------|---|----------------------------------------------------------------------------------------------------------------------------------------|
| Kouyaté, & Flessa, 2009)                                     |      |   |                                                                                                                                        |
| Ensor (Ensor et al., 2002)                                   | 2002 | 5 | essential package at primary health care                                                                                               |
| Govender (Govender et al., 2013)                             | 2013 | 5 | Not about community-based health insurance specifically                                                                                |
| Heunis (Heunis, van Rensburg, & Claassens, 2006)             | 2006 | 5 | essential package at primary health care                                                                                               |
| Hansen(Gotzsche & Johansen, 2008)                            | 2008 | 5 | essential package at primary health care                                                                                               |
| Jowett(Jowett, Peters, Reynolds, & Wilson-Barnett, 2001)     | 2011 | 5 | Not about CBHI specifically                                                                                                            |
| Lin (Lin, Lin, Yen, Loh, & Chwo, 2009)                       | 2009 | 8 | National health insurance                                                                                                              |
| Liu (Liu et al., 2012)                                       | 2012 | 6 | Not outcome of interest                                                                                                                |
| Lahariya (Lahariya, Mishra, Nandan, Gautam, & Gupta, 2011)   | 2011 | 8 | Cash transfer                                                                                                                          |
| Molina (Molina & Palazuelos, 2014)                           | 2014 | 8 | Social health insurance                                                                                                                |
| Marnani (Marnani, Teymourzadeh, Bahadori, Ravangard, & Pour) | 2012 | 5 | This study focused on health insurance (which could be any type of health insurance) not community-based health insurance specifically |
| Mugo (Mugo & Wang'ombe, 2009)                                | 2009 | 5 | Not about community-based health insurance (essential package at primary health care)                                                  |

|                                                                                  |      |    |                                                                                       |
|----------------------------------------------------------------------------------|------|----|---------------------------------------------------------------------------------------|
| Mueller (Mueller, Lungu, Acharya, & Palmer, 2011)                                | 2011 | 5  | Not about community-based health insurance (essential package at primary health care) |
| Nguyen(Nguyen & Knowles, 2010)                                                   | 2010 | 5  | Not about community-based health insurance                                            |
| Nandi (Nandi et al., 2012)                                                       | 2012 | 5  | Not about community-based health insurance                                            |
| (Onwujekwe, Onoka, et al., 2010)                                                 | 2010 | 4  | Proposed scheme                                                                       |
| (Onwujekwe, Okereke, et al., 2010)                                               | 2010 | 7  | Willingness to pay                                                                    |
| Petit (Petit, Sondorp, Mayhew, Roura, & Roberts, 2013)                           | 2013 | 5  | Not about community-based health insurance (essential package at primary health care) |
| Perez (Perez et al., 2013)                                                       | 2013 | 5  | Not about community-based health insurance (Primary health care interventions)        |
| Rechel (Rechel & Khodjamurodov, 2010)                                            | 2010 | 5  | Not about community-based health insurance (essential package at primary health care) |
| Reddy and Mary                                                                   | 2010 | 3  | Case study with no methods section                                                    |
| Robyn (Robyn et al., 2014)                                                       | 2012 | 10 | Impact study                                                                          |
| Soors (Soors, Devadasan, Durairaj, & Criel, 2010)                                | 2010 | 5  | Not about community-based health insurance (focuses on primary health care)           |
| Tejativaddhana(Tejativaddhana, Briggs, Fraser, Minichiello, & Cruickshank, 2013) | 2013 | 5  | Not about community-based health insurance (focuses on primary health care)           |

|                                               |      |    |                                            |
|-----------------------------------------------|------|----|--------------------------------------------|
| Wang (Wang, Gu, & Dupre, 2008)                | 2008 | 5  | Not about community-based health insurance |
| Yi(Yi, Zhang, Singer, Rozelle, & Atlas, 2009) | 2009 | 5  | Not about community-based health insurance |
| Yu (Yu et al., 2010)                          | 2010 | 10 | Impact study (health service utilization)  |
| Zhang (Zhang et al., 2010)                    | 2010 | 5  | Not about community-based health insurance |
| Zhu (Zhu, Dib, Zhang, Tang, & Liu, 2008)      | 2008 | 10 | Impact study                               |
| Zhou (Zhou et al., 2013)                      | 2013 | 6  | Not outcome of interest                    |
| Zhou (Zhou et al., 2014)                      | 2014 | 10 | Impact study                               |

## References of excluded studies

- Aggarwal, A. (2010). Impact evaluation of India's 'Yeshasvini' community-based health insurance programme. *Health Economics*, 19 Suppl, 5-35. doi:<http://dx.doi.org/10.1002/hec.1605>
- Arhin, D. C. (1994). The health card insurance scheme in Burundi: a social asset or a non-viable venture? *Soc Sci Med*, 39(6), 861-870.
- Baleba, A. N., Gankpe, F., Mesenge, C., Aoun, O., & Rapp, C. (2013). Cameroonian communal health insurances and managerial performance, a clashing couple. *Tropical Medicine and International Health*, 18, 203. doi:<http://dx.doi.org/10.1111/tmi.12163>
- Bascolo, E., & Yavich, N. (2009). Governance and the effectiveness of the Buenos Aires public health insurance implementation process. *Journal of Ambulatory Care Management*, 32(2), 91-102. doi:<http://dx.doi.org/10.1097/JAC.0b013e31819941bb>
- Baza, A., Hakizimana, A., Hanson, K., Kwizera, F., Van Der Geest, Sjaak (1993). Health insurance and the bamako initiative in Burundi: Value for money?
- Blaakman, A. P., Salehi, A. S., & Boitard, R. (2014). A cost and technical efficiency analysis of two alternative models for implementing the basic package of health services in Afghanistan. *Global Public Health*, 9(SUPPL.1), S110-S123. doi:<http://dx.doi.org/10.1080/17441692.2013.829862>
- Borghini, J., Maluka, S., Kuwawenaruwa, A., Makawia, S., Tantau, J., Mtei, G., . . . Macha, J. (2013). Promoting universal financial protection: a case study of new management of community health insurance in Tanzania. *Health Research Policy & Systems*, 11, 21. doi:<http://dx.doi.org/10.1186/1478-4505-11-21>
- Chen, C., Yang, Z., Li, Z., & Li, L. (2012). Accuracy of several cervical screening strategies for early detection of cervical cancer: A meta-analysis. *International Journal of Gynecological Cancer*, 22(6), 908-921.
- De Allegri, M., Sauerborn, R., Kouyaté, B., & Flessa, S. (2009). Community health insurance in sub-Saharan Africa: what operational difficulties hamper its successful development? *Tropical Medicine & International Health*, 14(5), 586-596.
- Dong, H., Gbangou, A., De Allegri, M., Pokhrel, S., & Sauerborn, R. (2008). The differences in characteristics between health-care users and non-users: implication for introducing community-based health insurance in Burkina Faso. *The European Journal of Health Economics*, 9(1), 41-50.
- Ensor, T., Dave-Sen, P., Ali, L., Hossain, A., Begum, S. A., & Moral, H. (2002). Do essential service packages benefit the poor? Preliminary evidence from Bangladesh. *Health Policy Plan*, 17(3), 247-256.
- Gotzsche, P. C., & Johansen, H. K. (2008). House dust mite control measures for asthma: Systematic review. *Allergy: European Journal of Allergy and Clinical Immunology*, 63(6), 646-659.
- Govender, V., Chersich, M. F., Harris, B., Alaba, O., Ataguba, J. E., Nxumalo, N., & Goudge, J. (2013). Moving towards universal coverage in South Africa? Lessons from a voluntary government insurance scheme. *Glob Health Action*, 6, 19253. doi:<http://dx.doi.org/10.3402/gha.v6i0.19253>
- Heunis, J. C., van Rensburg, H. C., & Claassens, D. L. (2006). Assessment of the implementation of the primary health care package at selected sites in South Africa. *Curationis*, 29(4), 37-46.
- Jowett, S., Peters, M., Reynolds, H., & Wilson-Barnett, J. (2001). The UKCC's Scope of Professional Practice--some implications for health care delivery. *J Nurs Manag*, 9(2), 93-100.
- Lahariya, C., Mishra, A., Nandan, D., Gautam, P., & Gupta, S. (2011). Additional cash incentive within a conditional cash transfer scheme: a 'controlled before and during' design evaluation study from India. *Indian J Public Health*, 55(2), 115-120. doi:10.4103/0019-557x.85245
- Lin, J. D., Lin, Y. W., Yen, C. F., Loh, C. H., & Chwo, M. J. (2009). Received, understanding and satisfaction of National Health Insurance premium subsidy scheme by families of children with disabilities: a census study in Taipei City. *Research in Developmental Disabilities*, 30(2), 275-283. doi:<http://dx.doi.org/10.1016/j.ridd.2008.04.004>
- Liu, X., Tang, S., Yu, B., Phuong, N. K., Yan, F., Thien, D. D., & Tolhurst, R. (2012). Can rural health insurance improve equity in health care utilization? A comparison between China and Vietnam.

*International Journal for Equity in Health*, 11, 10. doi:<http://dx.doi.org/10.1186/1475-9276-11-10>

- Marnani, A. B., Teymourzadeh, E., Bahadori, M., Ravangard, R., & Pour, J. S. Challenges of a Large Health Insurance Organization in Iran: A Qualitative Study.
- Molina, R. L., & Palazuelos, D. (2014). Navigating and circumventing a fragmented health system: the patient's pathway in the Sierra Madre Region of Chiapas, Mexico. *Medical Anthropology Quarterly*, 28(1), 23-43. doi:<http://dx.doi.org/10.1111/maq.12071>
- Mueller, D. H., Lungu, D., Acharya, A., & Palmer, N. (2011). Constraints to implementing the Essential Health Package in Malawi. *PLoS ONE*, 6(6), e20741. doi:10.1371/journal.pone.0020741
- Mugo, M. G., & Wang'ombe, J. K. (2009). Costing resource gaps for the delivery of minimum essential health services package in the Coast Province, Kenya. *East Afr J Public Health*, 6(3), 326-331.
- Nandi, S., Kanungo, K., Khan, M. H., Soibam, H., Mishra, T., & Garg, S. (2012). A study of Rashtriya Swasthya Bima Yojana in Chhattisgarh, India. *BMC Proceedings*, 6.
- Nguyen, H., & Knowles, J. (2010). Demand for voluntary health insurance in developing countries: the case of Vietnam's school-age children and adolescent student health insurance program. *Soc Sci Med*, 71(12), 2074-2082. doi:10.1016/j.socscimed.2010.09.033
- Onwujekwe, O., Okereke, E., Onoka, C., Uzochukwu, B., Kirigia, J., & Petu, A. (2010). Willingness to pay for community-based health insurance in Nigeria: do economic status and place of residence matter? *Health Policy and Planning*, 25(2), 155-161.
- Onwujekwe, O., Onoka, C., Uguru, N., Nnenna, T., Uzochukwu, B., Eze, S., . . . Petu, A. (2010). Preferences for benefit packages for community-based health insurance: an exploratory study in Nigeria. *BMC health services research*, 10(1), 162.
- Perez, L. G., Sheridan, J. D., Nicholls, A. Y., Mues, K. E., Saleme, P. S., Resende, J. C., . . . Leon, J. S. (2013). Professional and community satisfaction with the Brazilian family health strategy. *Revista de Saude Publica*, 47(2), 403-413. doi:<http://dx.doi.org/10.1590/S0034-8910.2013047003868>
- Petit, D., Sondorp, E., Mayhew, S., Roura, M., & Roberts, B. (2013). Implementing a Basic Package of Health Services in post-conflict Liberia: perceptions of key stakeholders. *Social Science & Medicine*, 78, 42-49. doi:<http://dx.doi.org/10.1016/j.socscimed.2012.11.026>
- Rechel, B., & Khodjamurodov, G. (2010). International involvement and national health governance: the basic benefit package in Tajikistan. *Social Science & Medicine*, 70(12), 1928-1932. doi:<http://dx.doi.org/10.1016/j.socscimed.2010.02.029>
- Robyn, P. J., Barnighausen, T., Soares, A., Traore, A., Bicaba, B., Sie, A., & Sauerborn, R. (2014). Provider payment methods and health worker motivation in community-based health insurance: A mixed-methods study. *Social Science and Medicine*, 108, 223-236. doi:<http://dx.doi.org/10.1016/j.socscimed.2014.01.034>
- Soors, W., Devadasan, N., Durairaj, V., & Criel, B. (2010). Community health insurance and universal coverage: multiple paths, many rivers to cross. *World health report*.
- Tarrier, N., Taylor, K., & Gooding, P. (2008). Cognitive-behavioral interventions to reduce suicide behavior: A systematic review and meta-analysis. *Behavior Modification*, 32(1), 77-108.
- Tejativaddhana, P., Briggs, D., Fraser, J., Minichiello, V., & Cruickshank, M. (2013). Identifying challenges and barriers in the delivery of primary healthcare at the district level: a study in one Thai province. *International Journal of Health Planning & Management*, 28(1), 16-34. doi:<http://dx.doi.org/10.1002/hpm.2118>
- Wang, H., Gu, D., & Dupre, M. E. (2008). Factors associated with enrollment, satisfaction, and sustainability of the New Cooperative Medical Scheme program in six study areas in rural Beijing. *Health Policy*, 85(1), 32-44. doi:10.1016/j.healthpol.2007.06.003
- Yi, H., Zhang, L., Singer, K., Rozelle, S., & Atlas, S. (2009). Health insurance and catastrophic illness: a report on the New Cooperative Medical System in rural China. *Health Economics*, 18 Suppl 2, S119-127. doi:<http://dx.doi.org/10.1002/hec.1510>
- Yu, B., Meng, Q., Collins, C., Tolhurst, R., Tang, S., Yan, F., . . . Liu, X. (2010). How does the New Cooperative Medical Scheme influence health service utilization? A study in two provinces in

- rural China. *BMC Health Services Research*, 10, 116. doi:<http://dx.doi.org/10.1186/1472-6963-10-116>
- Zhang, L., Cheng, X., Liu, X., Zhu, K., Tang, S., Bogg, L., . . . Tolhurst, R. (2010). Balancing the funds in the New Cooperative Medical Scheme in rural China: determinants and influencing factors in two provinces. *International Journal of Health Planning & Management*, 25(2), 96-118. doi:<http://dx.doi.org/10.1002/hpm.988>
- Zhou, Z., Su, Y., Gao, J., Campbell, B., Zhu, Z., Xu, L., & Zhang, Y. (2013). Assessing equity of healthcare utilization in rural China: results from nationally representative surveys from 1993 to 2008. *International Journal for Equity in Health*, 12, 34. doi:<http://dx.doi.org/10.1186/1475-9276-12-34>
- Zhou, Z., Zhu, L., Zhou, Z., Li, Z., Gao, J., & Chen, G. (2014). The effects of China's urban basic medical insurance schemes on the equity of health service utilisation: evidence from Shaanxi Province. *International Journal for Equity in Health*, 13, 23. doi:<http://dx.doi.org/10.1186/1475-9276-13-23>
- Zhu, M., Dib, H. H., Zhang, X., Tang, S., & Liu, L. (2008). The influence of health insurance towards accessing essential medicines: the experience from Shenzhen labor health insurance. *Health Policy*, 88(2-3), 371-380. doi:<http://dx.doi.org/10.1016/j.healthpol.2008.04.008>
