# Supplementary material for: Barriers and facilitators to implementation, uptake and sustainability of community-based health insurance schemes in low- and middle-income countries: a systematic review
Source: Int J Equity Health. 2018 Jan 29;17:13. doi: 10.1186/s12939-018-0721-4 (PMC5789675; doi:10.1186/s12939-018-0721-4)
Supplement: Supplementary file 2 — List of coding themes corresponding to each level of the ecological model (PDF 195 kb) [file 12939_2018_721_MOESM2_ESM.pdf]

Supplementary file 2: List of coding themes corresponding to each level of the ecological model

| <b>Individual level</b>                                                                                                                                                                                                                                                                                                       | <b>Interpersonal level</b>     | <b>Community level</b> | <b>Financial Arrangement</b> | <b>Governance arrangement</b>                                            | <b>Delivery Arrangement</b>      |
|-------------------------------------------------------------------------------------------------------------------------------------------------------------------------------------------------------------------------------------------------------------------------------------------------------------------------------|--------------------------------|------------------------|------------------------------|--------------------------------------------------------------------------|----------------------------------|
| Consumer awareness of existence of scheme/package                                                                                                                                                                                                                                                                             | Relatives in the scheme        | Culture                | Amount of premium            | Re-imbursement policies                                                  | Quality of care                  |
| Willingness to enroll                                                                                                                                                                                                                                                                                                         | Household size                 | District-level factors | Pre-payment                  | Payment arrangement for health care personnel/facilities/centers/clinics | PHC network                      |
| Trust in health insurer                                                                                                                                                                                                                                                                                                       | Household head characteristics | Community involvement  | Method of premium collection | Political economy context (public-private sector)                        | Availability of health personnel |
| Socio-demographic factors <ul style="list-style-type: none"> <li>• Age</li> <li>• Gender,</li> <li>• Nationality,</li> <li>• Economic status</li> <li>• Occupation/employment</li> <li>• Health status</li> <li>• Geographic location/Residency</li> <li>• Education</li> <li>• Household Size</li> <li>• Religion</li> </ul> | Social solidarity              |                        | Timing of premium collection | Consumer & stakeholder involvement                                       | Management of health personnel   |

|                                                                                                                                                                      |  |  |                    |                                              |                                                                |
|----------------------------------------------------------------------------------------------------------------------------------------------------------------------|--|--|--------------------|----------------------------------------------|----------------------------------------------------------------|
| <ul style="list-style-type: none"> <li>• Ethnicity</li> <li>• Marital status</li> <li>• Migration</li> <li>• Per capita expenditure</li> <li>• Retirement</li> </ul> |  |  |                    |                                              |                                                                |
| Risky health behavior<br>(smoking, alcoholism)                                                                                                                       |  |  | Cost sharing       | Policymaker-implementer<br>relationship      | Competency of health<br>personnel                              |
| Sense of ownership of<br>program                                                                                                                                     |  |  | Premium subsidy    | Communication between<br>stakeholders        | Training of health<br>personnel                                |
| Satisfaction of enrollees                                                                                                                                            |  |  | Financial support  | Stakeholder understanding and<br>involvement | Provider-patient<br>interaction                                |
| Being insured with another<br>insurance scheme                                                                                                                       |  |  | Revenue collection | Degree of integrated PHC<br>services         | Quality of scheme                                              |
| Affordability of care                                                                                                                                                |  |  | Transport cost     | Sustenance of scheme                         | Facility environment                                           |
| Consumer understanding of<br>the concept of HBP                                                                                                                      |  |  |                    | Involvement of private sector                | Waiting hours                                                  |
| Perceptions or knowledge of<br>scheme management                                                                                                                     |  |  |                    | Ownership of scheme                          | Commitment of health<br>personnel to package<br>implementation |
| Closer proximity to nearest<br>health center                                                                                                                         |  |  |                    | Clearly defined roles                        | Commitment of health<br>care providers                         |

|  |  |  |  |                                         |                                                                |
|--|--|--|--|-----------------------------------------|----------------------------------------------------------------|
|  |  |  |  | Government role and support             | Referral system                                                |
|  |  |  |  | Management/administrative structure     | Working condition                                              |
|  |  |  |  | Common language across all stakeholders | Number of health care network, facilities, centers, clinics    |
|  |  |  |  | Legal framework and policy              | Distance to health care network, facilities, centers, clinics  |
|  |  |  |  | Macro-economic performance              | Patient access to specific health facilities, centers, clinics |
|  |  |  |  | Good leadership                         | Drug supply                                                    |
|  |  |  |  | Competition with other insurance        | Information system                                             |
|  |  |  |  | Political commitment                    | Availability of equipment, machinery, etc.                     |
|  |  |  |  | Policy translation                      | Incentive mechanisms                                           |
|  |  |  |  | Support for local management team       | Equity consideration                                           |

|  |  |  |  |                                                   |                                              |
|--|--|--|--|---------------------------------------------------|----------------------------------------------|
|  |  |  |  | Local health authorities' position on the package | Awareness of health personnel of the package |
|  |  |  |  | Accountability mechanisms                         | Contracting of service delivery              |
|  |  |  |  | Financial management                              | Geographical coverage of PHC                 |
|  |  |  |  | Sustainability of funding                         | Type of facility                             |
|  |  |  |  | Source of funding                                 | Condition of the facility                    |
|  |  |  |  | Adverse selection                                 | Place of awareness campaign                  |
|  |  |  |  | Resource allocation                               | Availability of protocols                    |
|  |  |  |  | HBP responds to consumers' needs and preferences  | Unit of enrolment                            |
|  |  |  |  | Content of health benefit package                 | Adequacy of PHC tests                        |
|  |  |  |  | Membership criteria                               | Essential service and catastrophic care      |
|  |  |  |  | Marketing and promotion strategies                | Prevention services                          |
|  |  |  |  | Enrolment strategies                              |                                              |
